# Supplementary material
Source: PubMed Central journal article supplement (PMC6173638)
Supplement: NIHMS1504257-supplement-9.pdf [file NIHMS1504257-supplement-9.pdf]

**Table S1. Proteins identified by mass spectrometry of nucleoid-bound proteins, related to Figure 1.**

Ribosome and ATP synthase subunits were filtered out. Shaded gray rows indicate known NAPs; green is GapR.

| Protein    | Function                                                                                                          | # of spectra |
|------------|-------------------------------------------------------------------------------------------------------------------|--------------|
| CCNA_01433 | Integration host factor subunit alpha ( <i>ihfA</i> )                                                             | 13           |
| CCNA_03162 | Arginine biosynthesis bifunctional protein ArgJ ( <i>argJ</i> )                                                   | 9            |
| CCNA_02036 | DNA-binding protein HU ( <i>hup</i> )                                                                             | 8            |
| CCNA_01330 | DNA-directed RNA polymerase subunit alpha ( <i>rpoA</i> )                                                         | 7            |
| CCNA_03428 | Uncharacterized protein conserved in bacteria                                                                     | 7            |
| CCNA_02063 | DNA uptake lipoprotein                                                                                            | 4            |
| CCNA_00537 | DNA-directed RNA polymerase subunit beta' ( <i>rpoC</i> )                                                         | 4            |
| CCNA_01621 | DNA-directed RNA polymerase subunit omega ( <i>rpoZ</i> )                                                         | 4            |
| CCNA_01535 | Single-stranded DNA-binding protein ( <i>ssb</i> )                                                                | 4            |
| CCNA_03701 | Integration host factor subunit beta ( <i>ihfB</i> )                                                              | 3            |
| CCNA_02594 | Protease HtpX homolog ( <i>htpX</i> )                                                                             | 3            |
| CCNA_02528 | Glycerol-3-phosphate acyltransferase ( <i>plsY</i> )                                                              | 3            |
| CCNA_01527 | Flagellin ( <i>fliL</i> )                                                                                         | 3            |
| CCNA_01059 | S-layer protein ( <i>rsaA</i> )                                                                                   | 3            |
| CCNA_01101 | Translation initiation factor IF-3 ( <i>infC</i> )                                                                | 2            |
| CCNA_00356 | conserved hypothetical protein/outer membrane protein                                                             | 2            |
| CCNA_02428 | Translation initiation factor IF-1 ( <i>infA</i> )                                                                | 1            |
| CCNA_01819 | RNA-binding protein Hfq ( <i>hfq</i> )                                                                            | 1            |
| CCNA_02082 | Sec-independent protein translocase protein TatA ( <i>tatA</i> )                                                  | 1            |
| CCNA_02646 | Cell division protein MraZ ( <i>mraZ</i> )                                                                        | 1            |
| CCNA_03303 | Elongation factor Tu                                                                                              | 1            |
| CCNA_02041 | ATP-dependent Clp protease proteolytic subunit ( <i>clpP</i> )                                                    | 1            |
| CCNA_01528 | Flagellin ( <i>fliK</i> )                                                                                         | 1            |
| CCNA_00834 | Flagellin ( <i>fliM</i> )                                                                                         | 1            |
| CCNA_03852 | 1-(5-phosphoribosyl)-5-[(5-phosphoribosylamino)methylideneamino]imidazole-4-carboxamide isomerase ( <i>hisA</i> ) | 1            |
