# Supplementary material
Source: PubMed Central journal article supplement (PMC6173638)
Supplement: NIHMS1504257-supplement-12.pdf [file NIHMS1504257-supplement-12.pdf]

**Table S4. Data collection and refinement statistics for GapR structures, related to Figure 6.**

|                                      | <b><i>Apo Bosea sp.</i><br/>Root 381 GapR</b>                   | <b><i>Caulobacter crescentus</i><br/>GapR-DNA</b>                   | <b><i>Bosea sp. Root 381</i><br/>GapR-DNA</b> |
|--------------------------------------|-----------------------------------------------------------------|---------------------------------------------------------------------|-----------------------------------------------|
| <b>Data collection</b>               |                                                                 |                                                                     |                                               |
| Pdb code                             | 6CFY                                                            | 6CG8                                                                | 6CFX                                          |
| Space group                          | P4 <sub>1</sub> 22                                              | C2                                                                  | P2 <sub>1</sub>                               |
| Crystallization Conditions           | 15% MPD, 10 mM MgCl <sub>2</sub> , HEPES (7.5) 0.001 M spermine | 28% PEG 400, 0.002 M spermine, HEPES (7.5), 0.2 M CaCl <sub>2</sub> | 1.7 M Ammonium sulphate, MES (6.5)            |
| Cell dimensions                      |                                                                 |                                                                     |                                               |
| <i>a</i> , <i>b</i> , <i>c</i> (Å)   | 39.6, 39.6, 205.1,                                              | 95.9, 35.6, 115.6                                                   | 51.3, 44.5, 107.1                             |
| $\alpha$ , $\beta$ , $\gamma$ (°)    | 90.0, 90.0, 120.0                                               | 90.0, 90.2, 90.0                                                    | 90.0, 101.8, 90.0                             |
| Resolution (Å)                       | 2.40 (38.8)*                                                    | 2.30 (57.8)                                                         | 2.0 (50.2)                                    |
| R <sub>sym</sub>                     | 0.099 (1.89)                                                    | 0.079 (0.358)                                                       | 0.059 (0.174)                                 |
| R <sub>pim</sub>                     | 0.041 (1.19)                                                    | 0.071 (0.267)                                                       | 0.042 (0.105)                                 |
| I/ $\sigma$ I                        | 9.8 (1.5)                                                       | 7.6 (2.4)                                                           | 10.5 (2.9)                                    |
| Redundancy                           | 11.2 (8.0)                                                      | 3.5 (3.5)                                                           | 2.5 (2.0)                                     |
| CC(1/2)                              | 0.997 (0.319)                                                   | 0.977 (0.956)                                                       | 0.994 (0.075)                                 |
| <b>Refinement</b>                    |                                                                 |                                                                     |                                               |
| Resolution (Å)                       | 2.40 (38.8)                                                     | 2.30 (57.8)                                                         | 2.0 (50.2)                                    |
| No. reflections                      | 12187                                                           | 32492                                                               | 29679                                         |
| R <sub>work</sub> /R <sub>free</sub> | 22.2/25.9                                                       | 24.1/26.8                                                           | 19.6/22.1                                     |
| R.m.s. deviations                    |                                                                 |                                                                     |                                               |
| Bond lengths (Å)                     | 0.018                                                           | 0.002                                                               | 0.003                                         |
| Bond angles (°)                      | 1.657                                                           | 0.690                                                               | 0.504                                         |
| Ramachandran analyses                |                                                                 |                                                                     |                                               |
| Favored (%)                          | 100.0                                                           | 98.7                                                                | 99.3                                          |
| Disallowed (%)                       | 0.0                                                             | 0.0                                                                 | 0.0                                           |

\*Data for highest resolution shell
