# Supplementary material
Source: PubMed Central journal article supplement (PMC6173638)

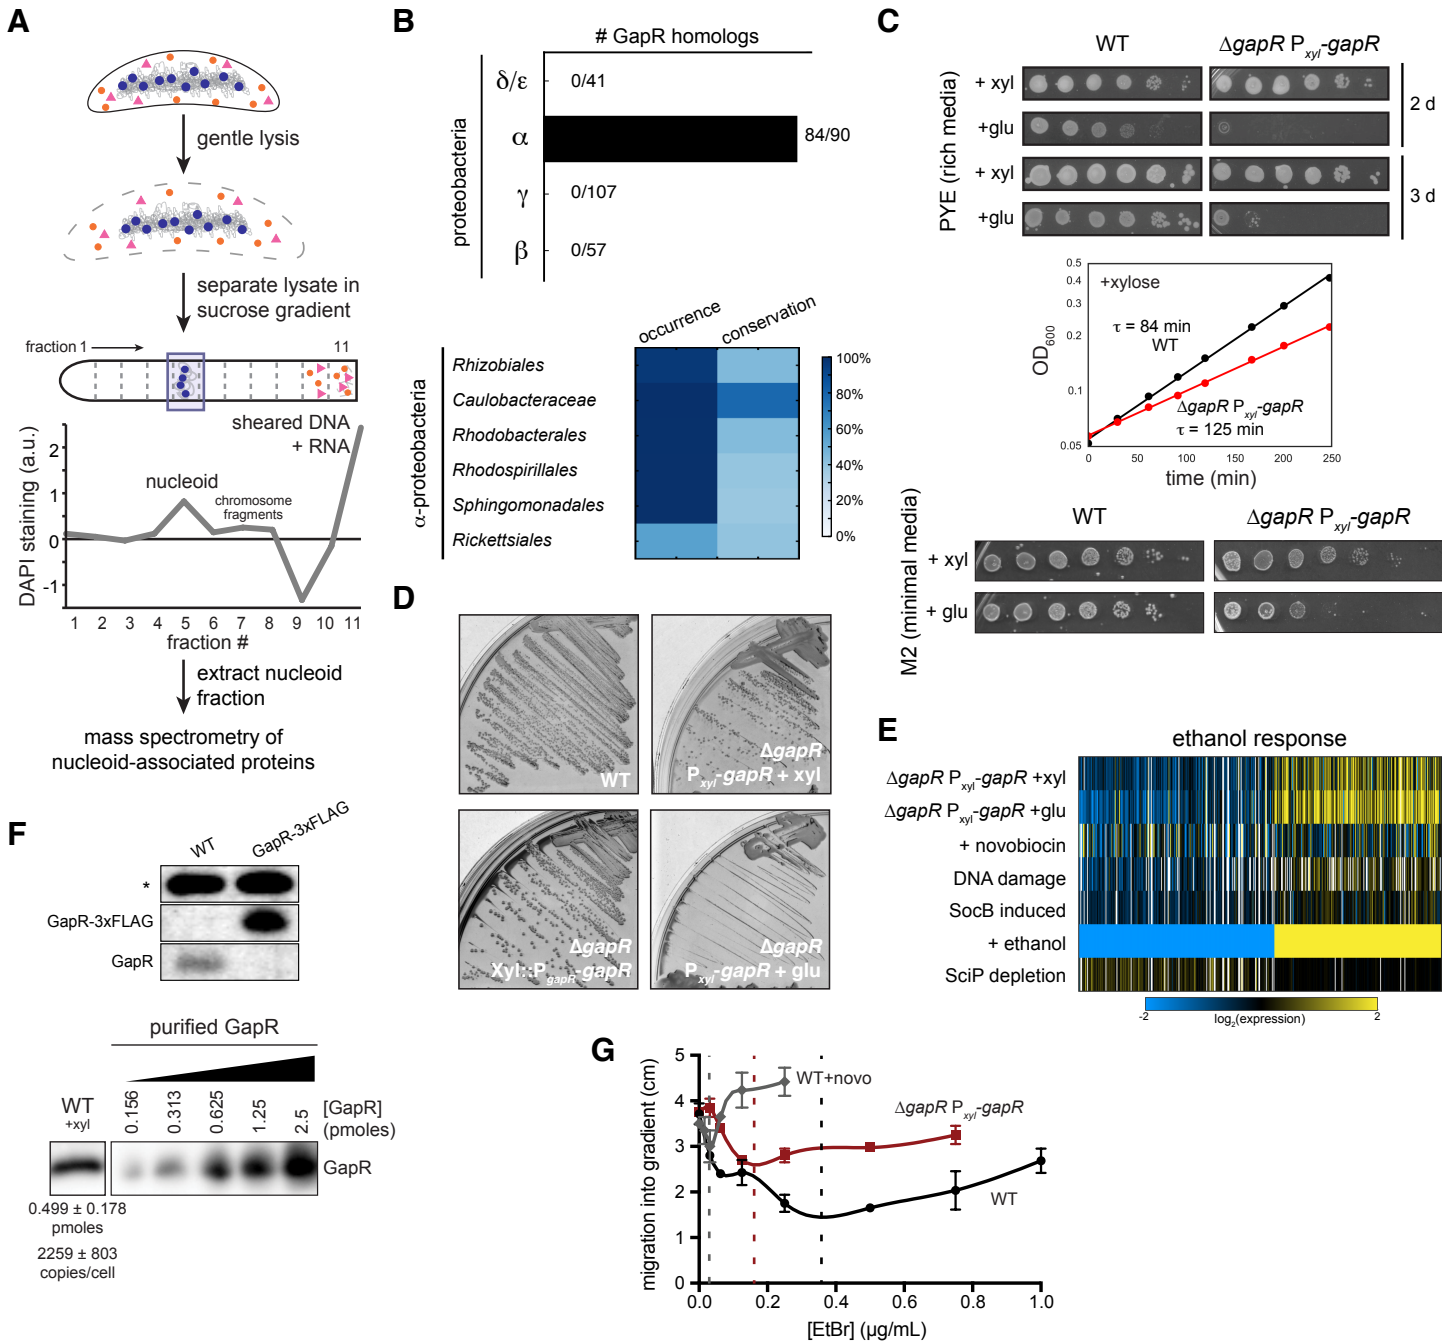

Supplement: NIHMS1504257-supplement-1.pdf [file NIHMS1504257-supplement-1.pdf]

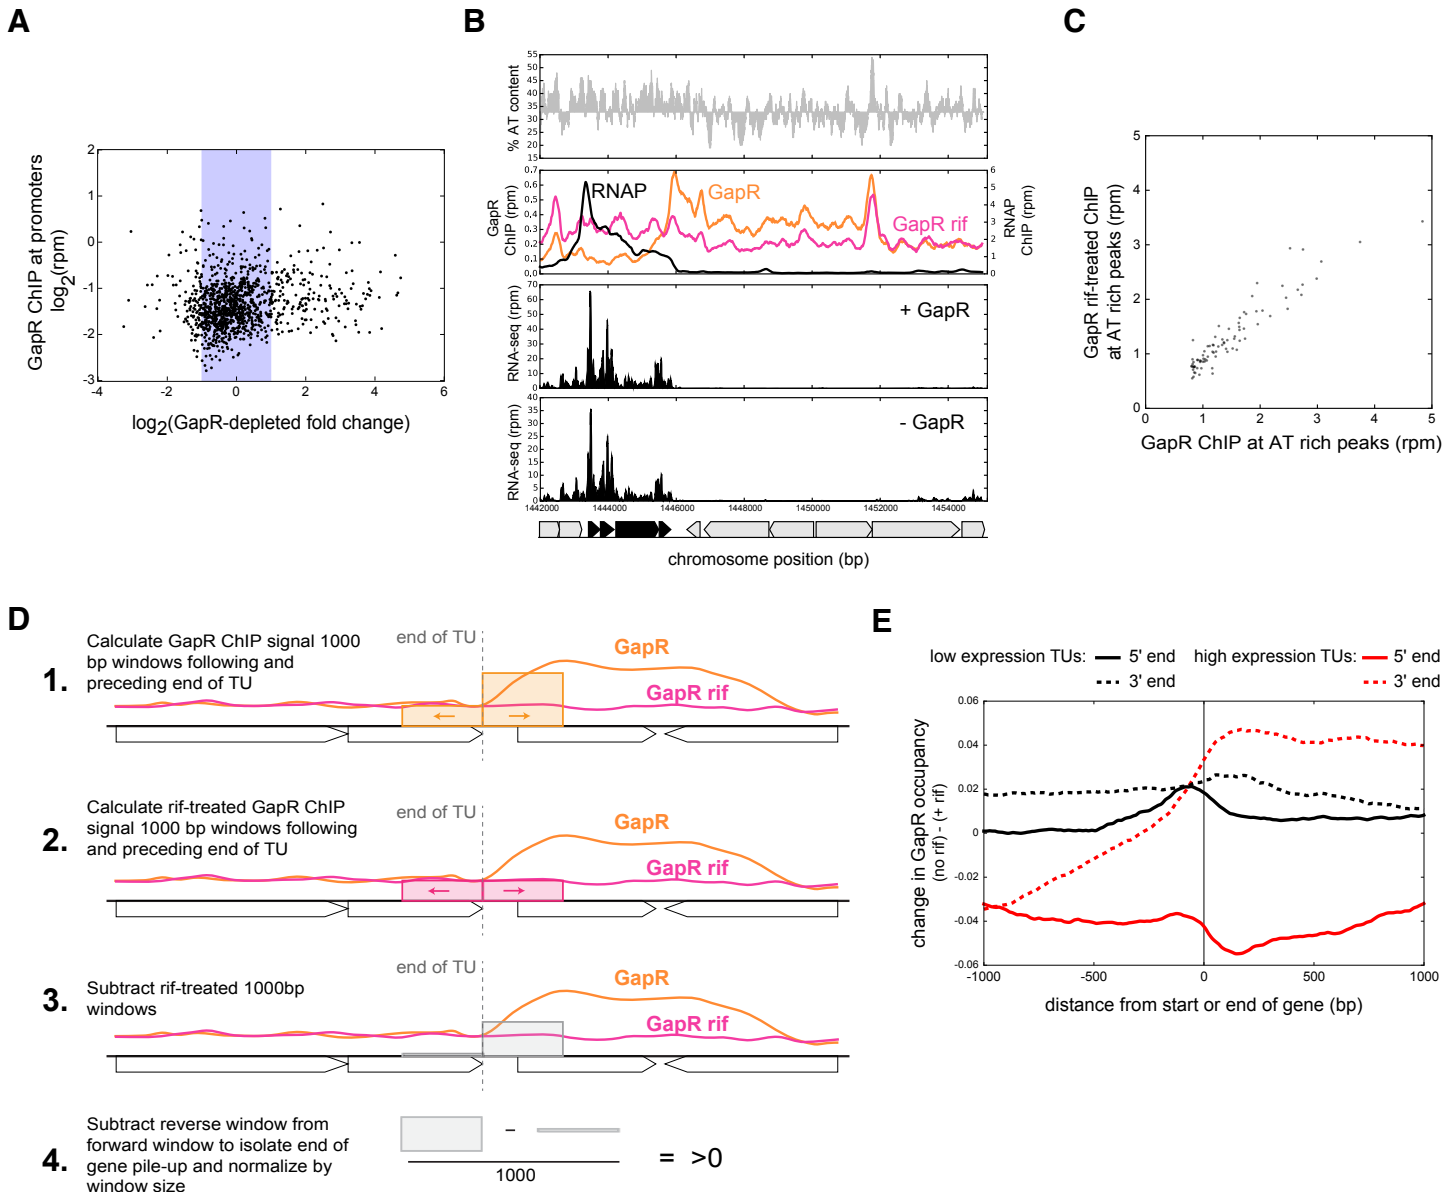

Supplement: NIHMS1504257-supplement-2.pdf [file NIHMS1504257-supplement-2.pdf]

Figure S3

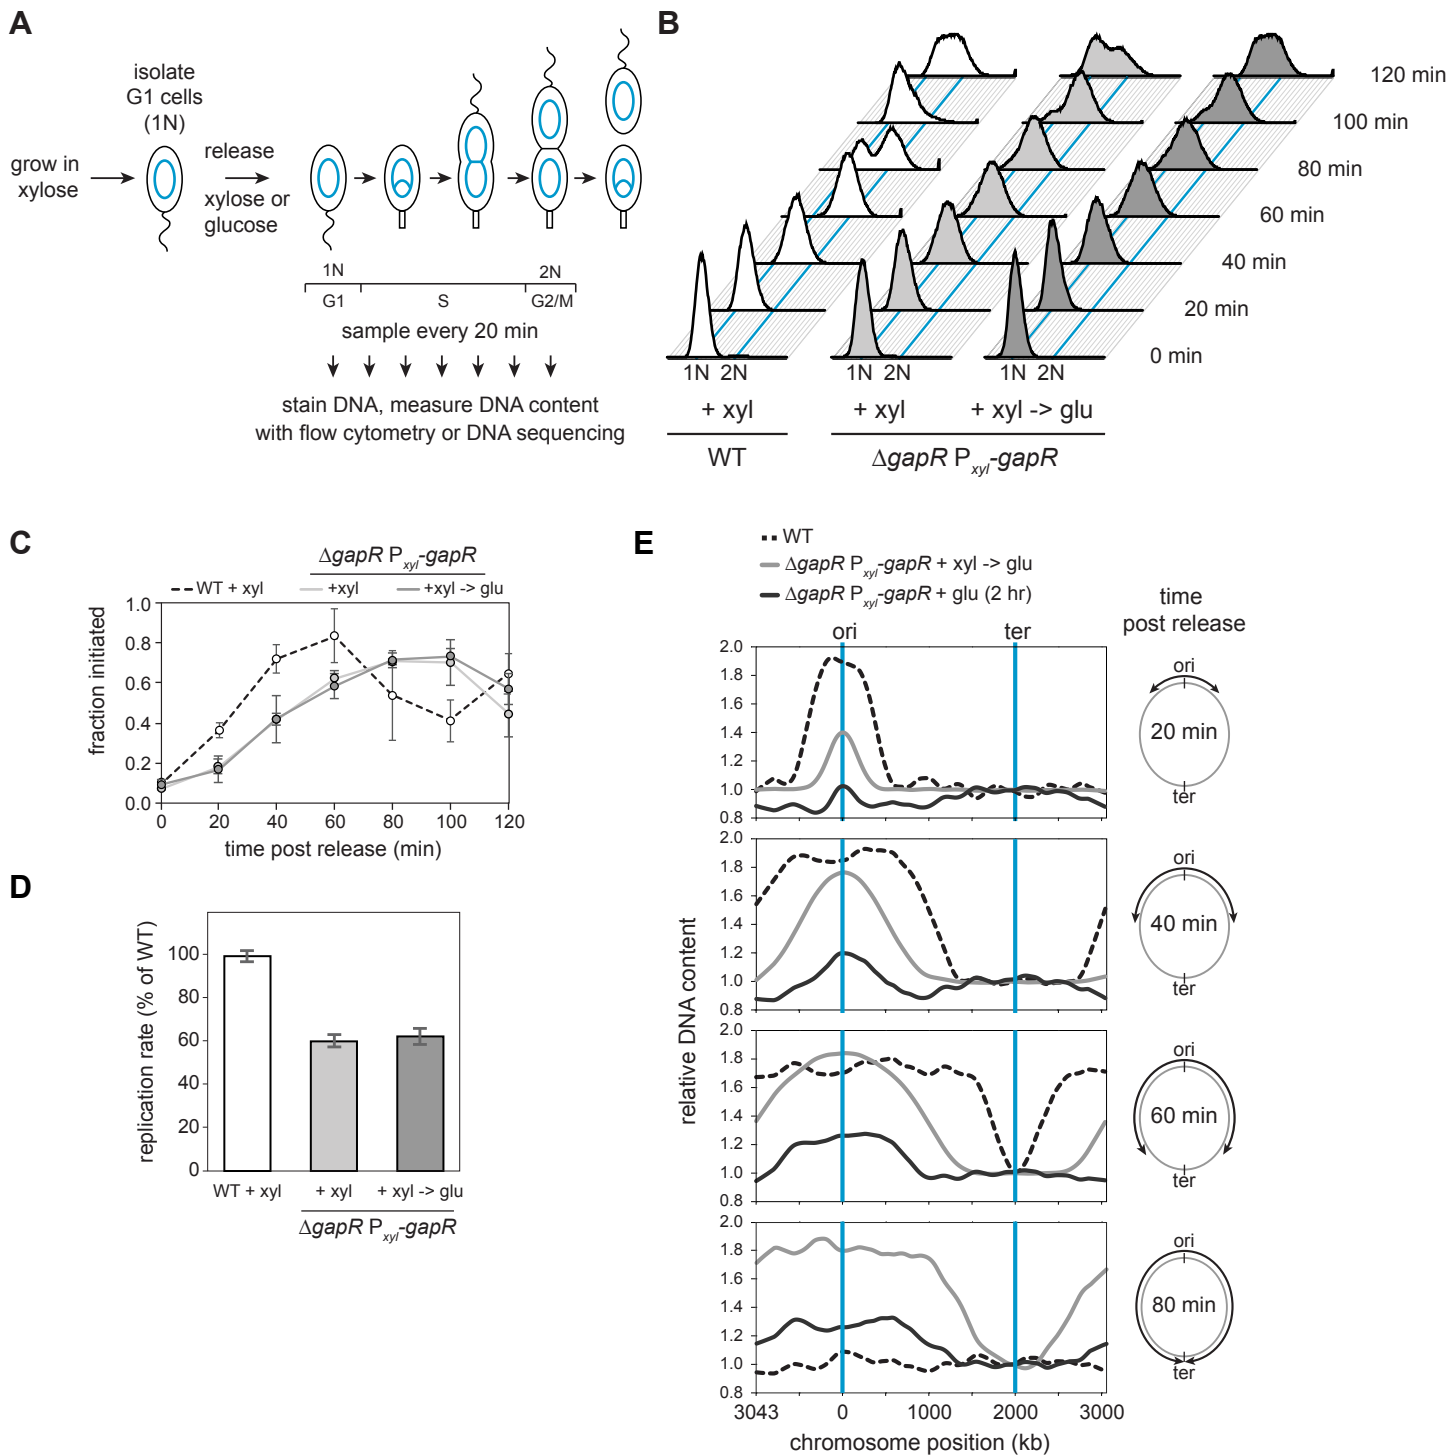

Supplement: NIHMS1504257-supplement-3.pdf [file NIHMS1504257-supplement-3.pdf]

**A**

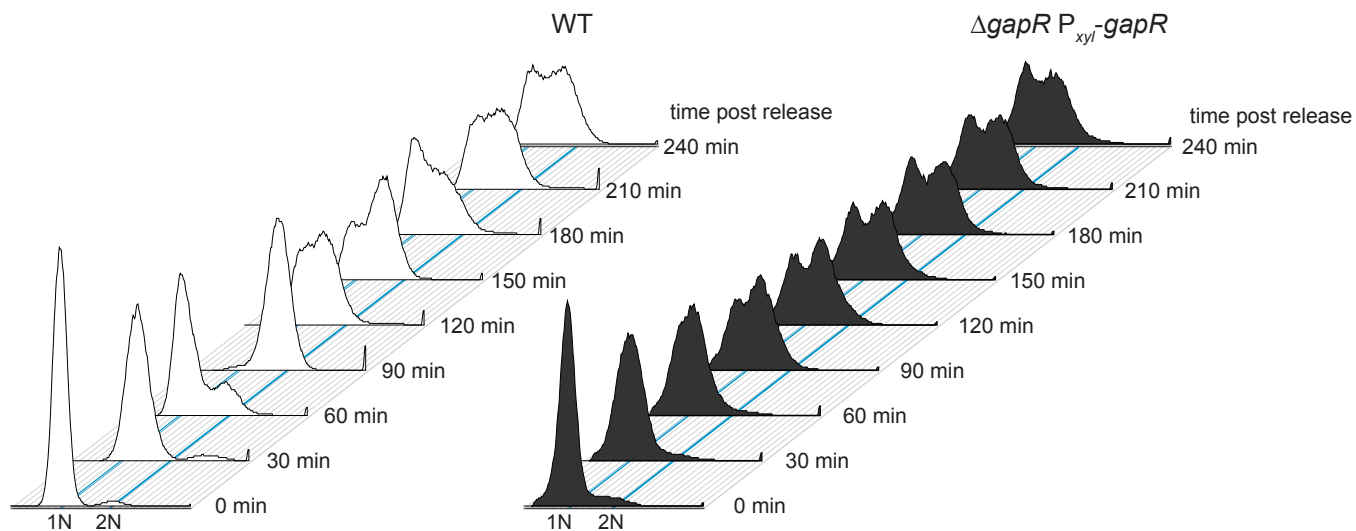

**B**

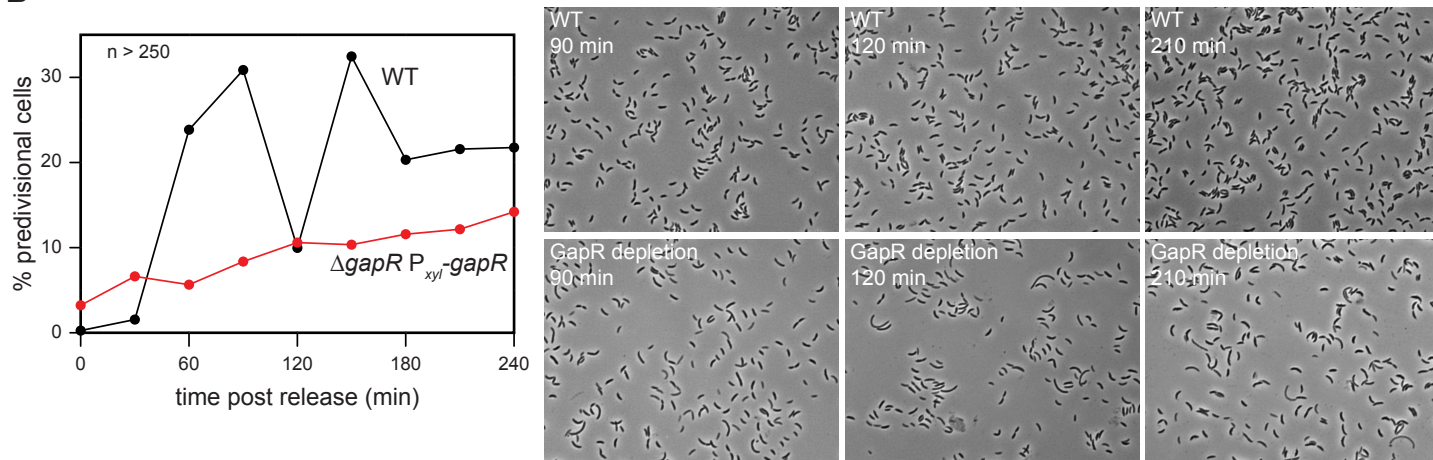

**C**

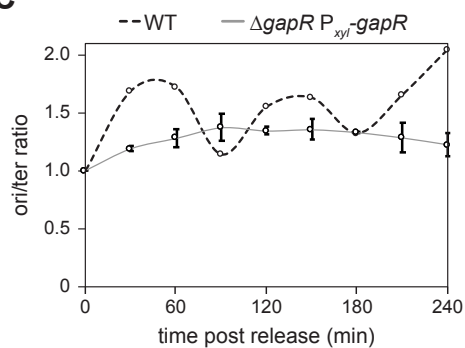

**D**

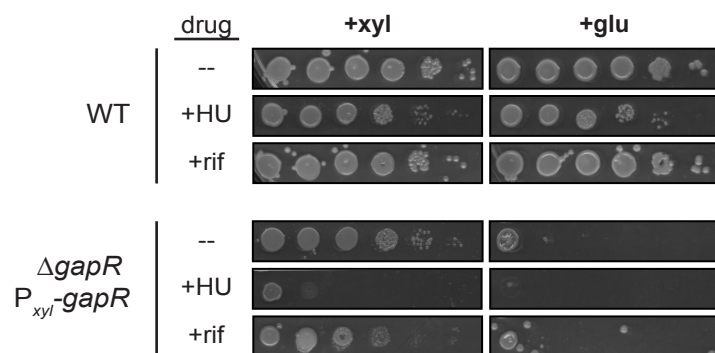

Supplement: NIHMS1504257-supplement-4.pdf [file NIHMS1504257-supplement-4.pdf]

Figure S5

A

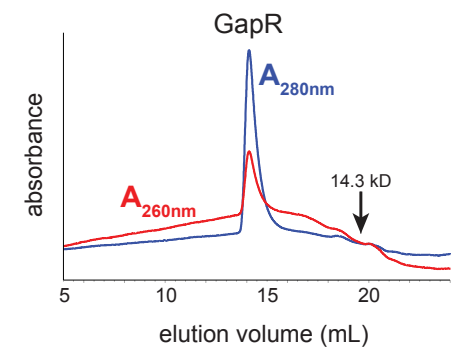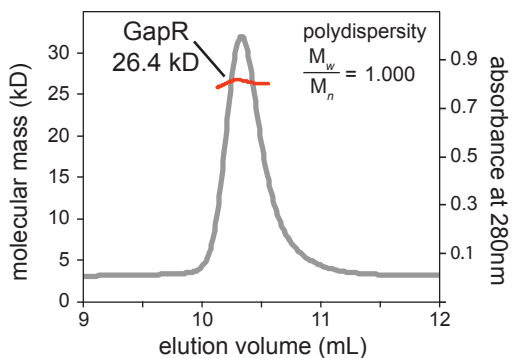

B

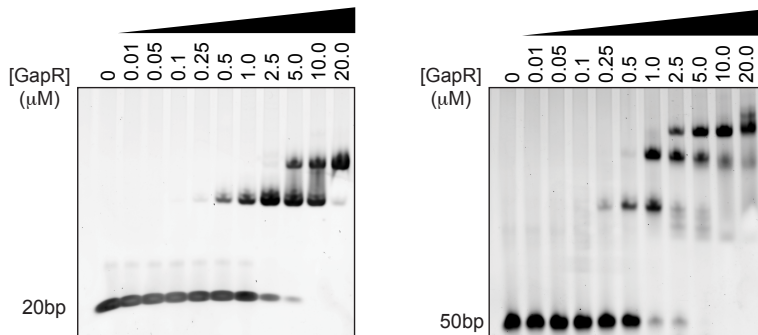

C

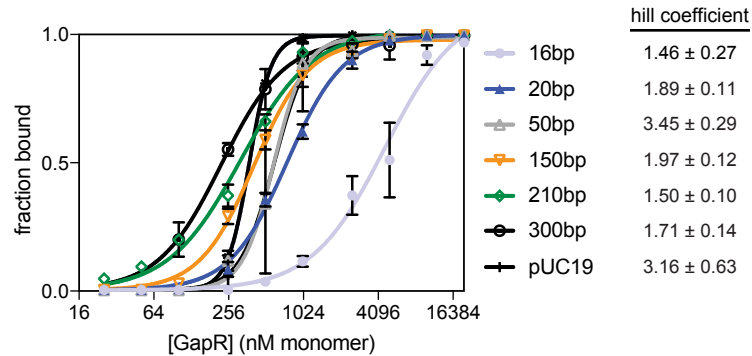

D

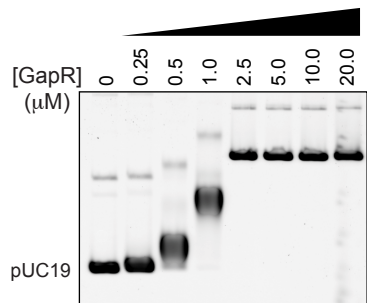

E

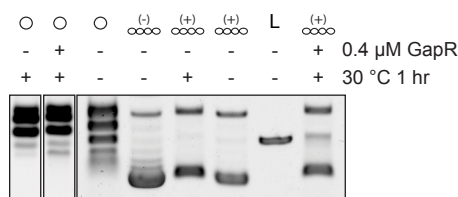

F

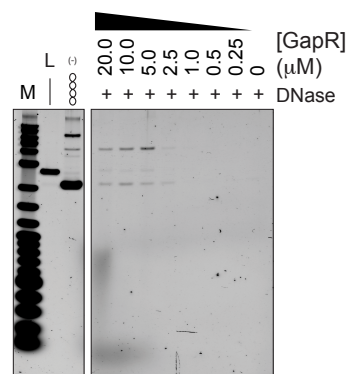

Supplement: NIHMS1504257-supplement-5.pdf [file NIHMS1504257-supplement-5.pdf]

A

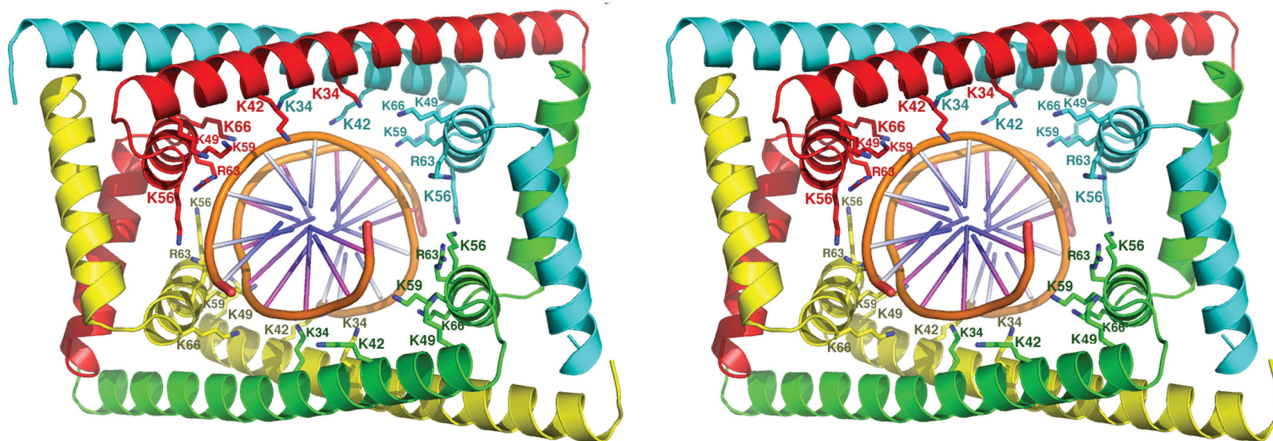

B

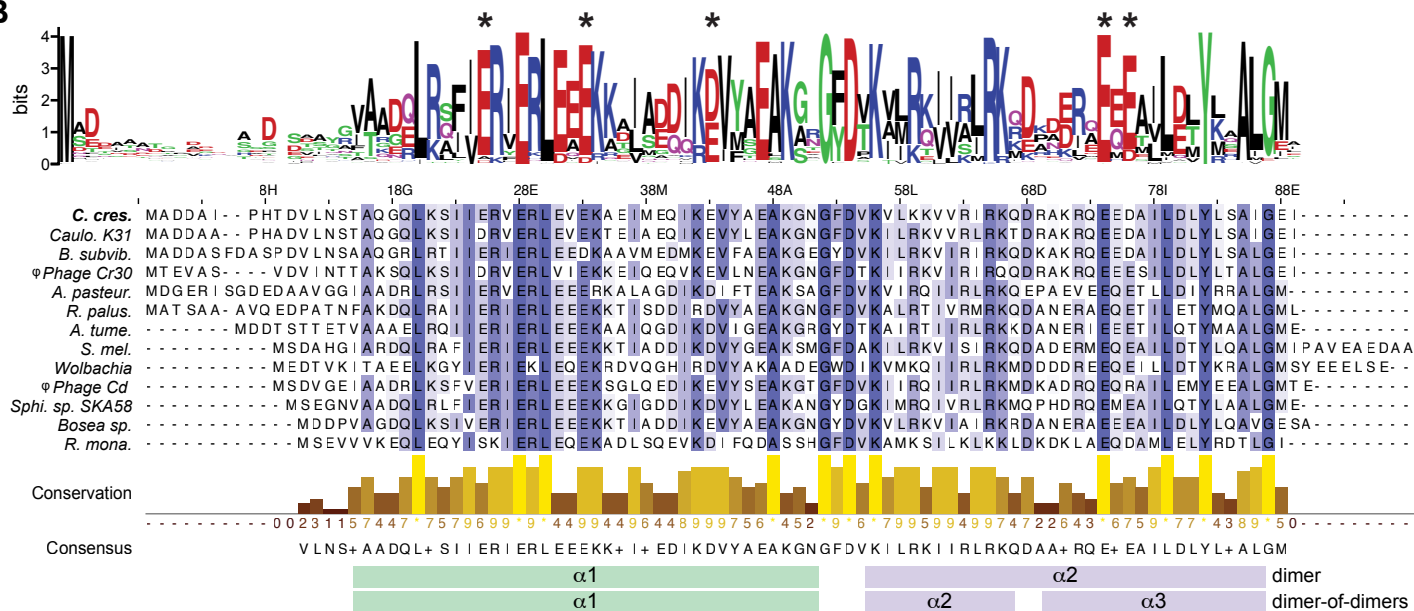

C

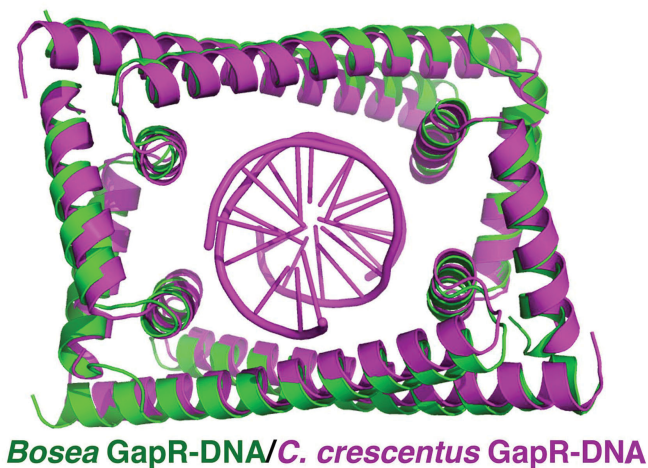

D

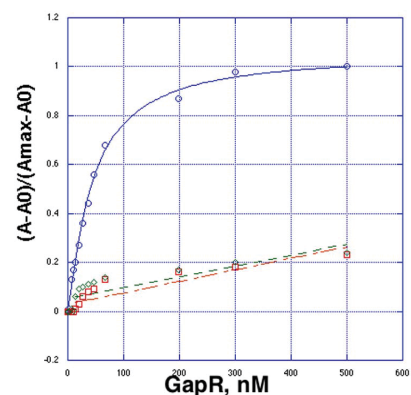

Supplement: NIHMS1504257-supplement-6.pdf [file NIHMS1504257-supplement-6.pdf]

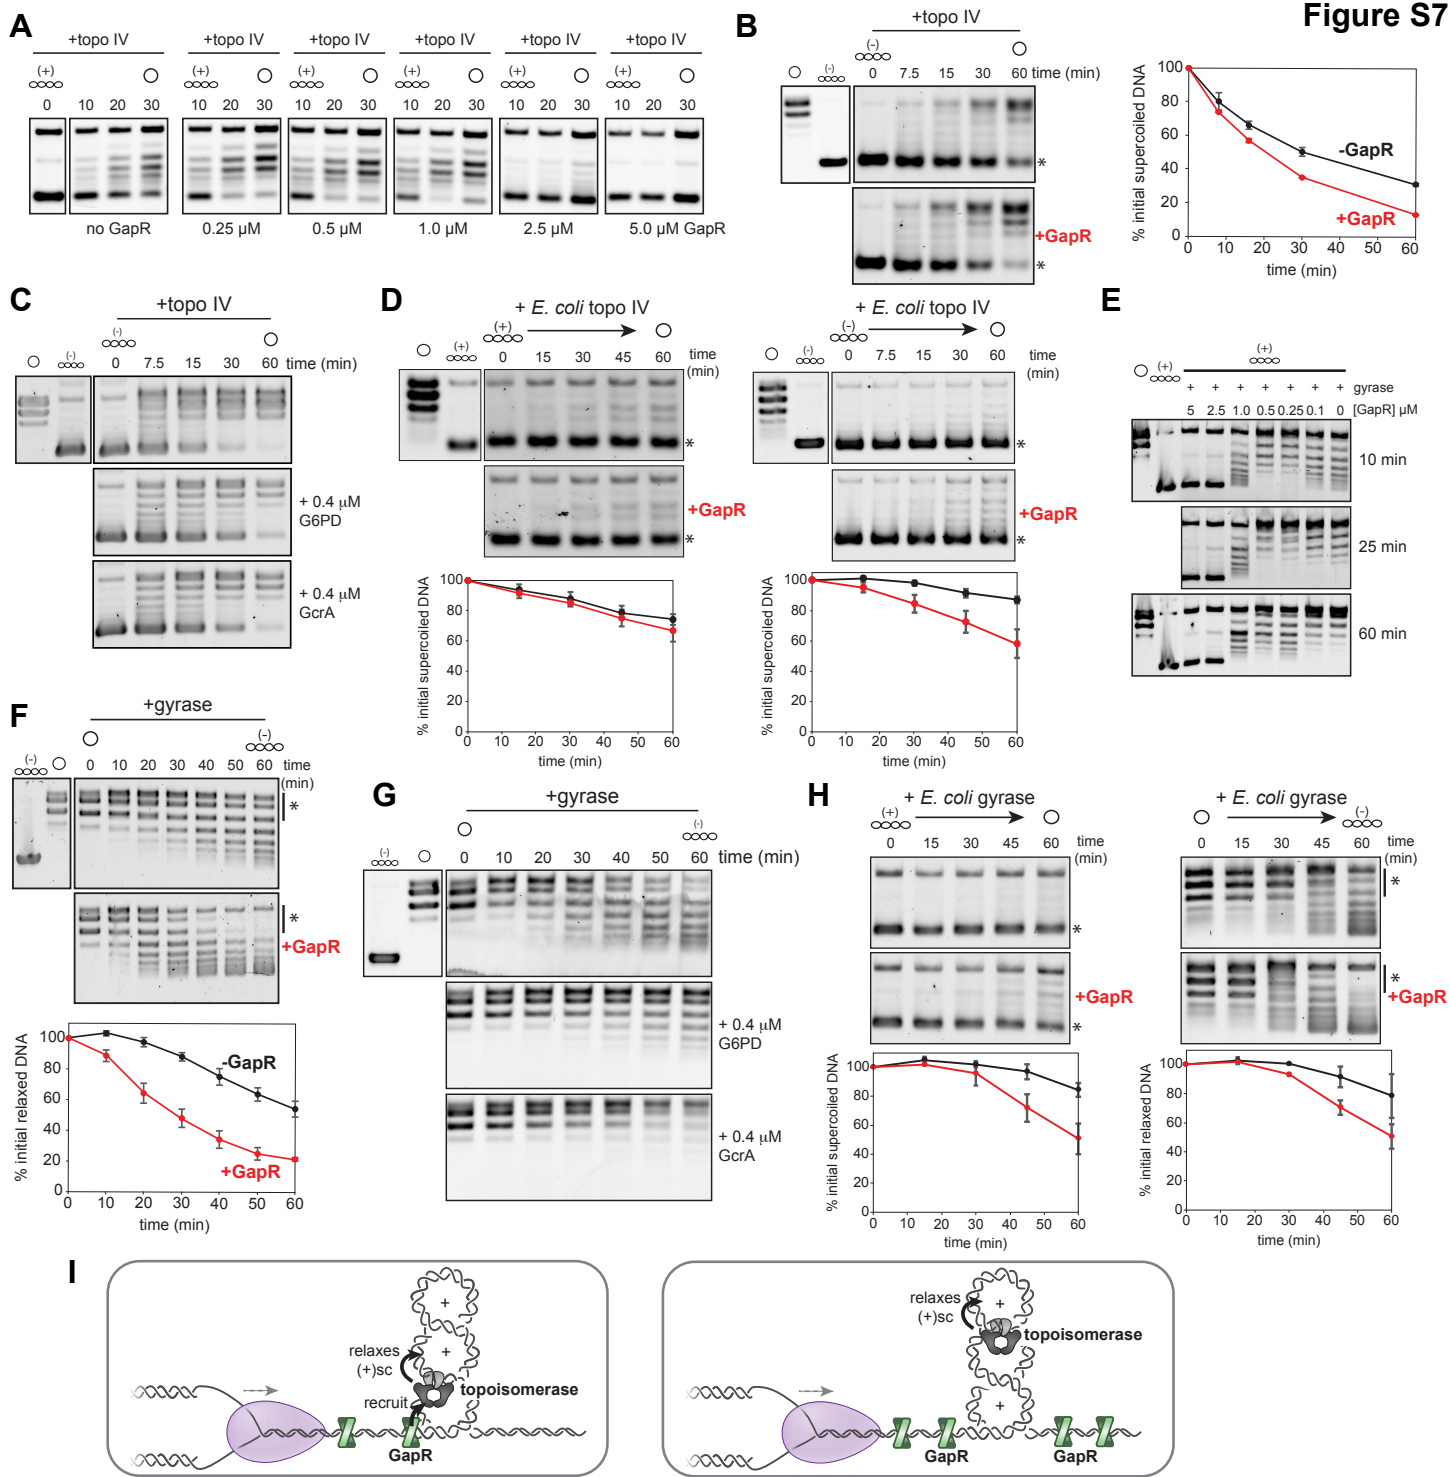

Supplement: NIHMS1504257-supplement-7.pdf [file NIHMS1504257-supplement-7.pdf]
